# Supplementary material for: A simple single jar “on–off fluorescence” designed system for the determination of mitoxantrone using an eosin Y dye in raw powder, vial, and human biofluids
Source: Royal Society of Chemistry journal article supplement (doi:10.1039/d2ra00120a), 2022-01-01
Supplement: d2ra00120a1.pdf [file d2ra00120a1.pdf]

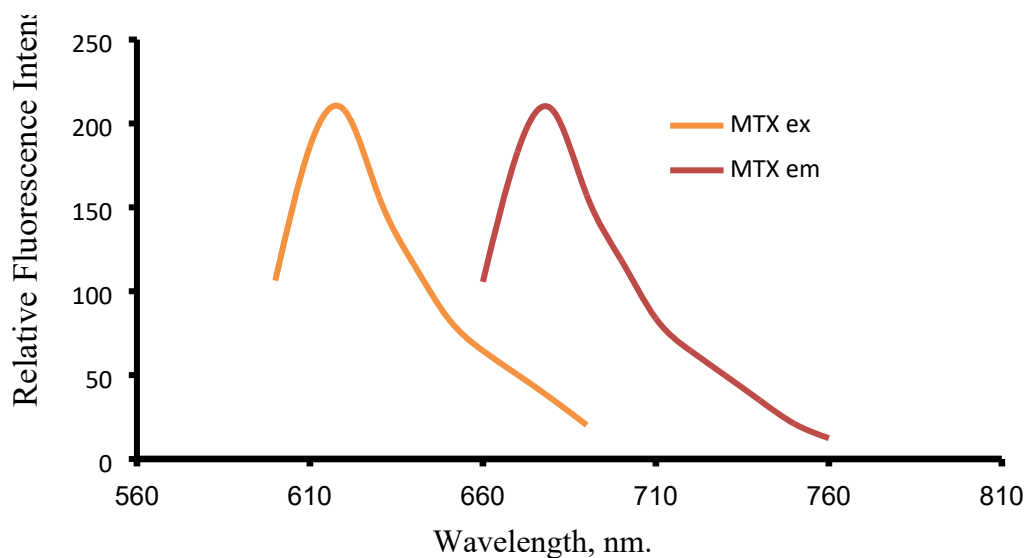

**SI 1.1:** Pure MTX ( $1.0 \mu\text{g mL}^{-1}$ ) spectra (excitation and emission) in aqueous buffered solution (pH 4).

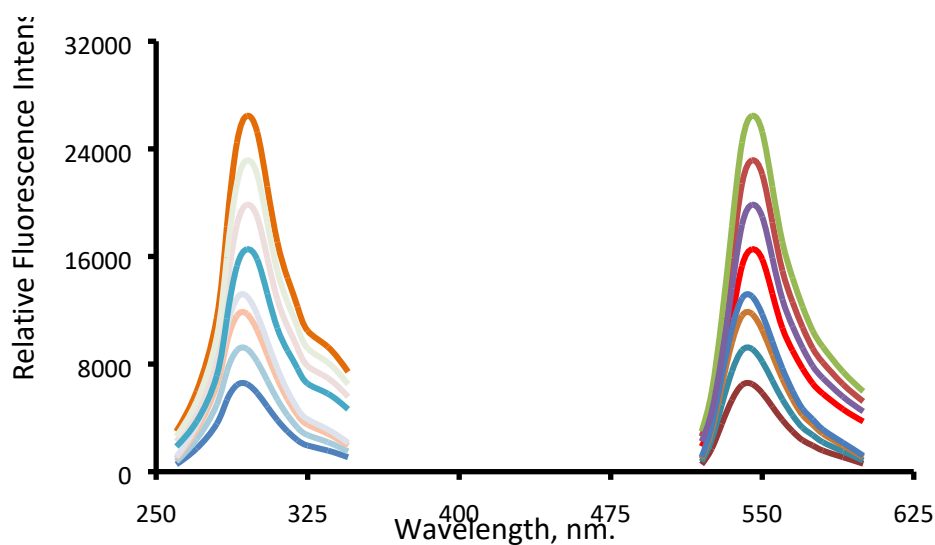

**SI 1.2:** Full spectra (excitation and emission) of the fully optimized MTX-EosinY system conditions at different MTX concentrations within the operating range.

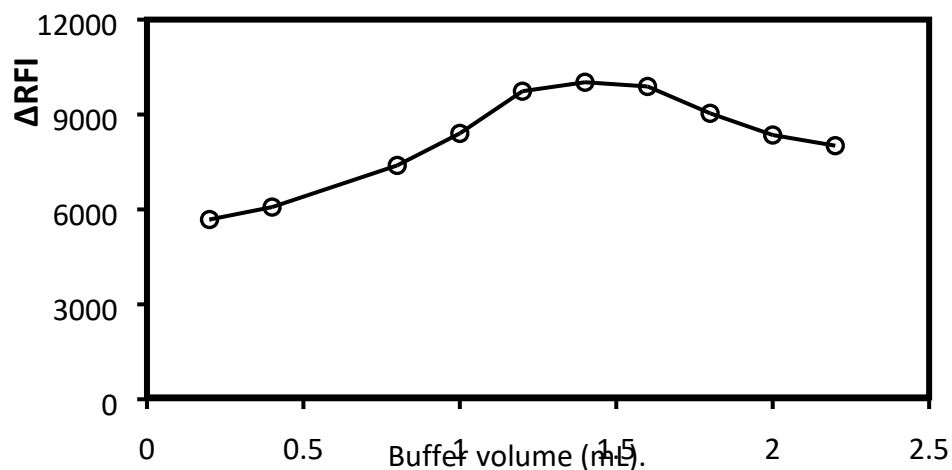

**SI 2.1:** Effect of buffer volume on the fluorescence quenching of the formed association complex between MTX ( $1.0 \mu\text{g mL}^{-1}$ ) and Eosin Y.

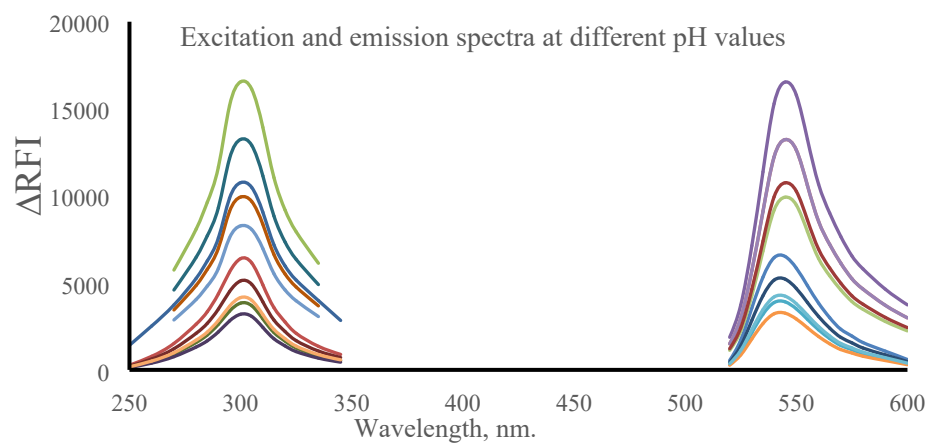

**SI 2.2:** Excitation and emission spectra at different pH values and buffer volumes for the formed association complex between MTX ( $1.0 \mu\text{g mL}^{-1}$ ) and Eosin Y.

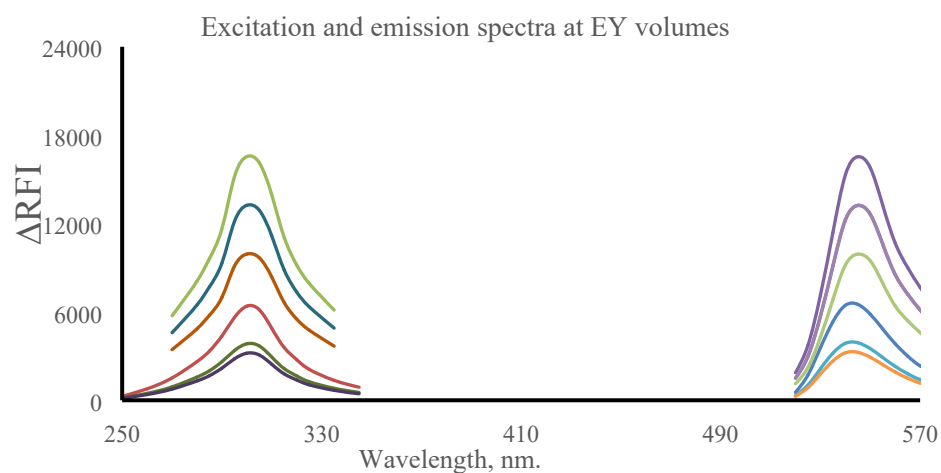

**SI 2.3:** Excitation and emission spectra at different volumes of EY (0.02% w/v) for the formed association complex between MTX ( $1.0 \mu\text{g mL}^{-1}$ ) and Eosin Y.

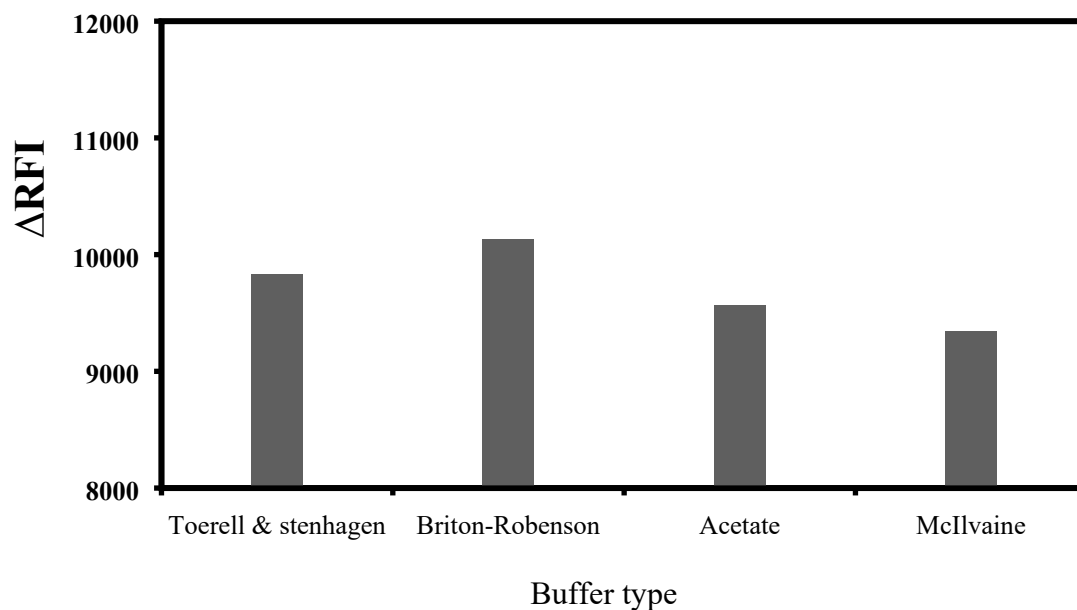

**SI 3:** Effect of buffer type on the fluorescence quenching of the formed association complex between MTX ( $1.0 \mu\text{g mL}^{-1}$ ) and Eosin Y.

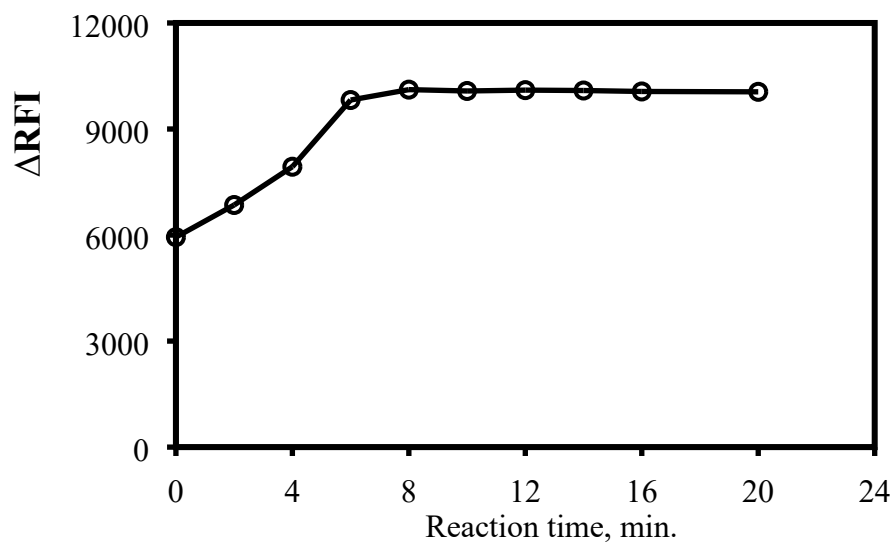

**SI 4:** Effect of reaction time on the fluorescence quenching of the formed association complex between MTX ( $1.0 \mu\text{g mL}^{-1}$ ) and Eosin Y.

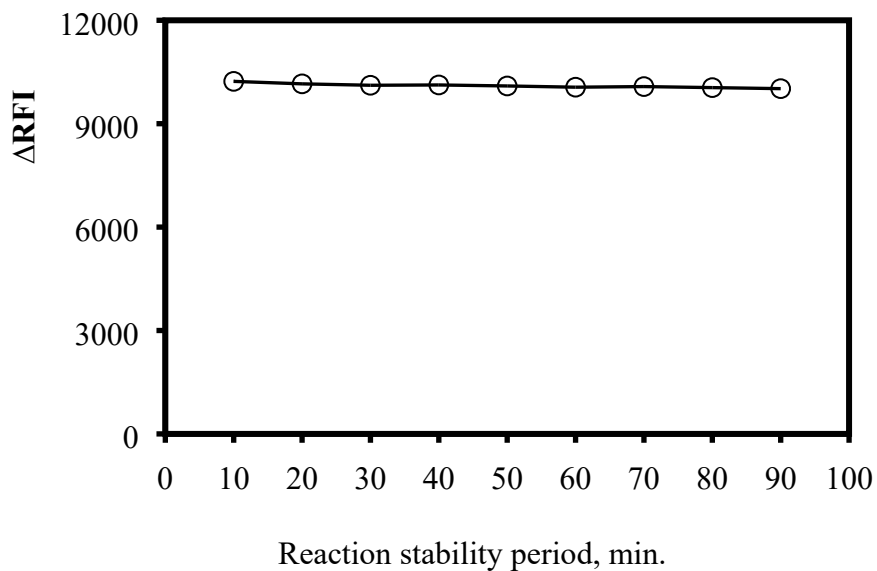

**SI 5:** Effect of stability time on the fluorescence quenching of the formed association complex between MTX ( $1.0 \mu\text{g mL}^{-1}$ ) and Eosin Y.

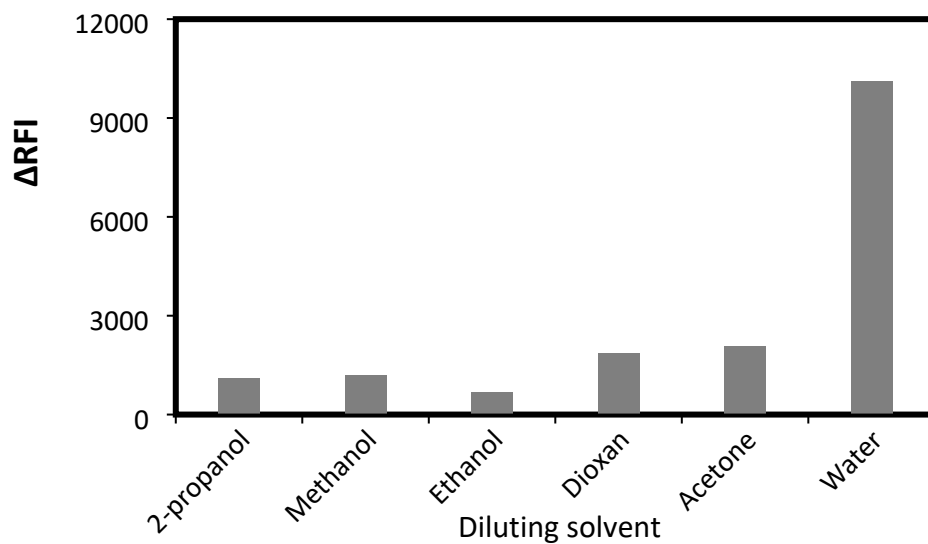

**SI 6.1:** Effect of diluting solvent on the fluorescence quenching of the formed association complex between MTX ( $1.0 \mu\text{g mL}^{-1}$ ) and Eosin Y.

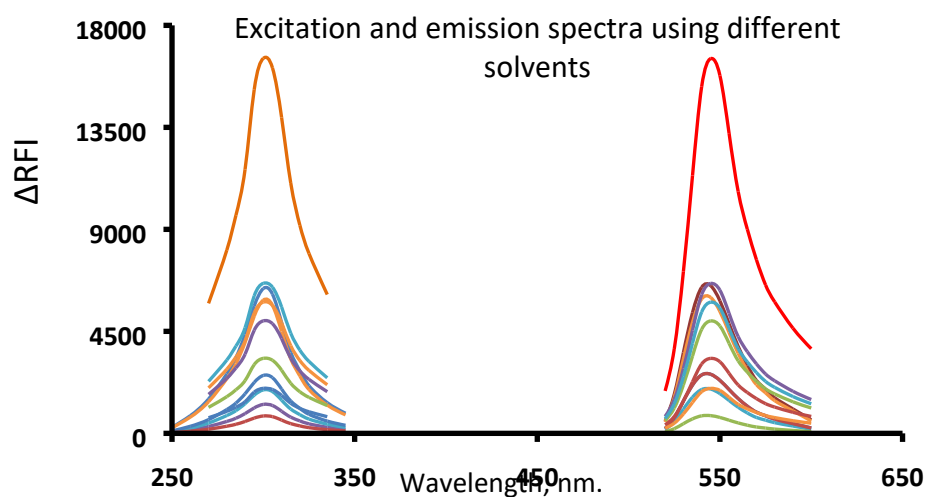

**SI 6.2:** Full excitation and emission spectra showing the effect of different diluting solvents on the formed association complex between MTX ( $1.0 \mu\text{g mL}^{-1}$ ) and Eosin Y.

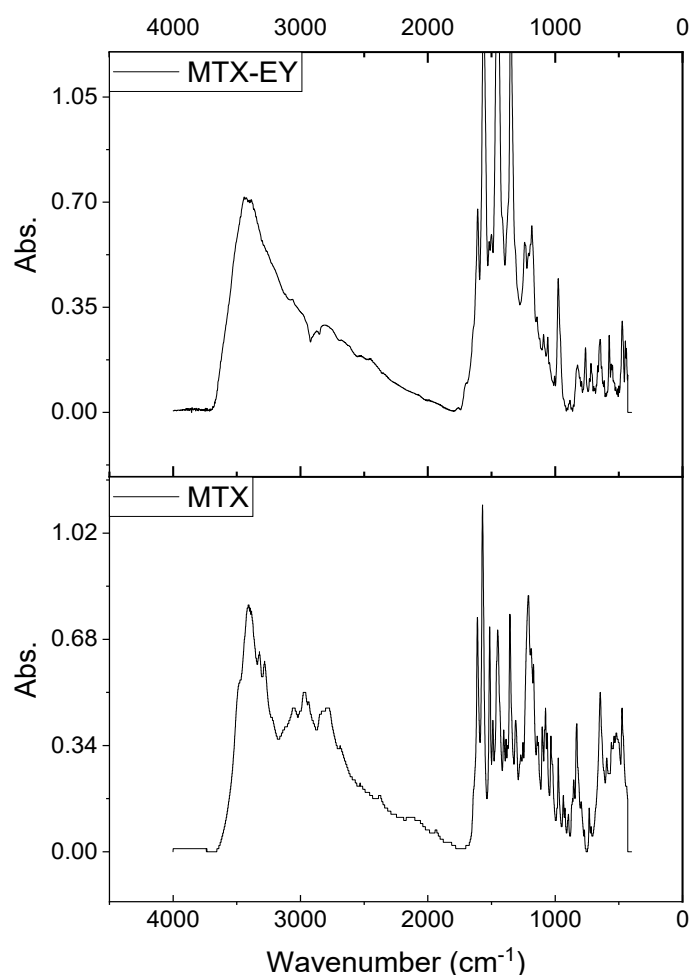

**SI 7:** FT-IR spectra for MTX and formed MTX-EY complex

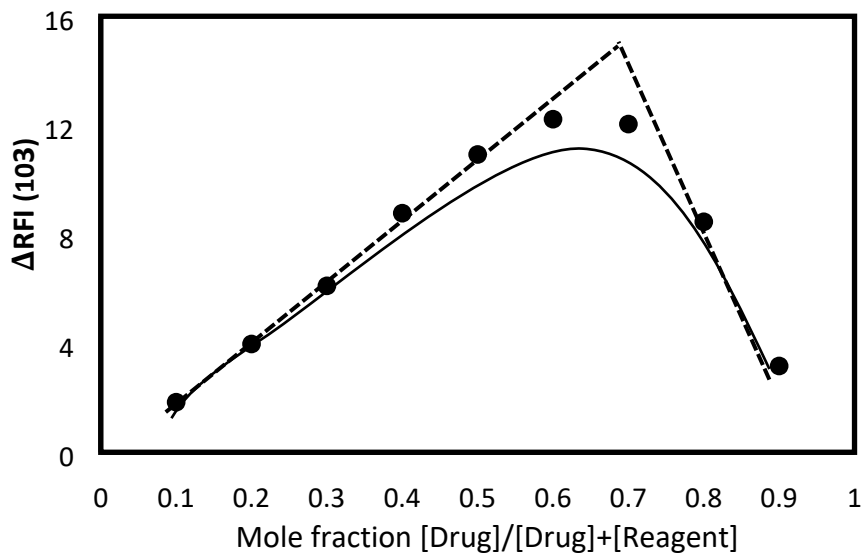

**SI 8:** Job's plot for association complex formation between MTX and eosin using an equimolar concentration ( $2.8 \times 10^{-4}$  M) of master solutions.

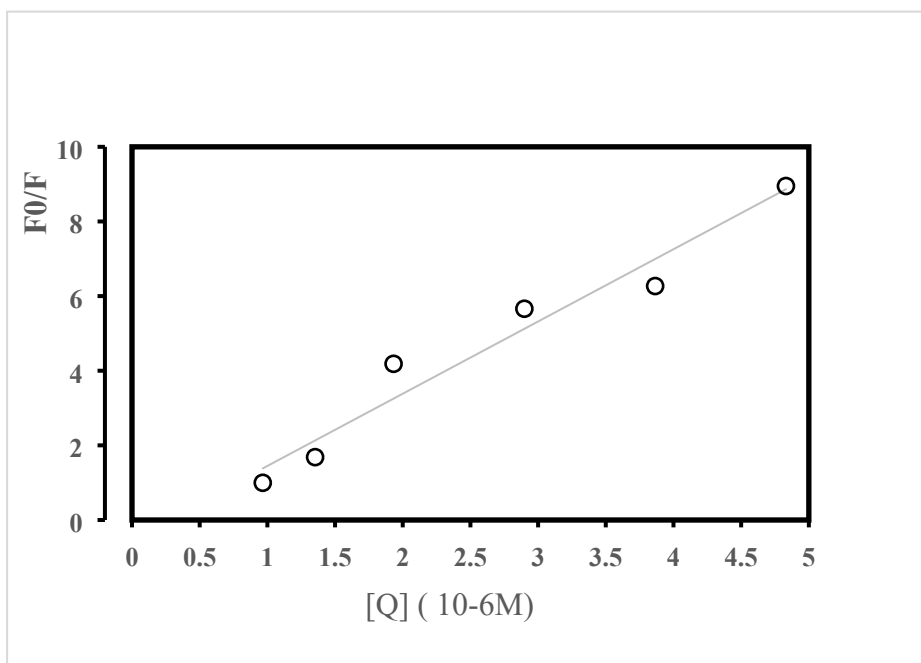

**SI 9:** Stern–Volmer plot describing Eosin Y quenching caused by MTX.

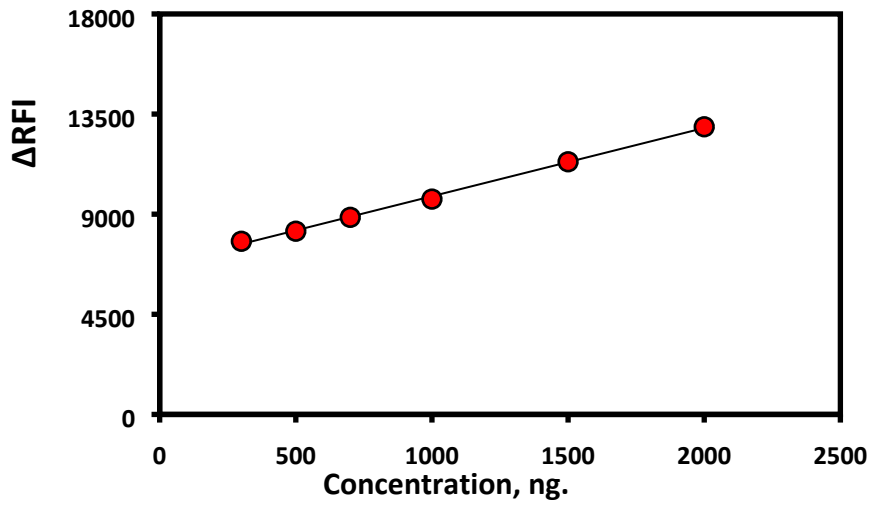

SI 10: Calibration curves for MTX in plasma.

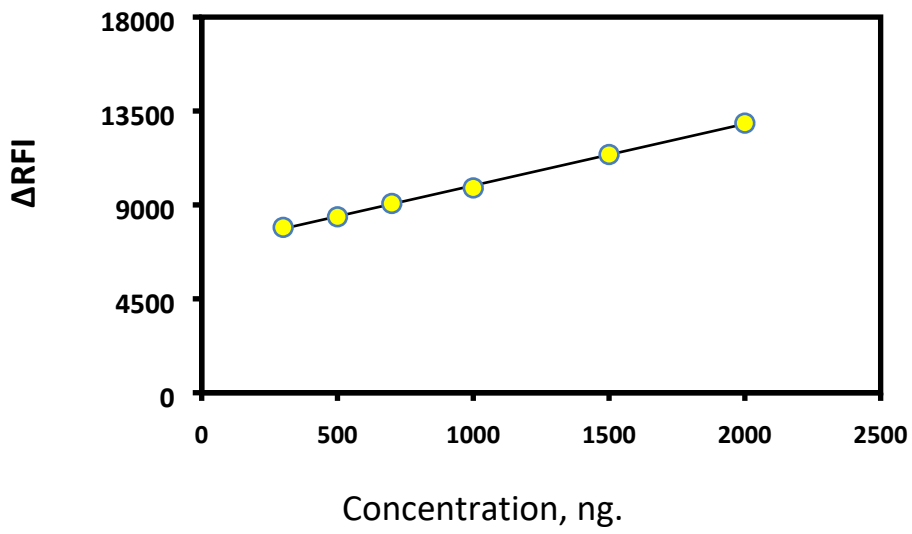

SI 11: Calibration curves for MTX in urine

**SI Table 1:** Comparable cases showing quenching of fluorescence upon association complex formation with MTX and other compounds with Eosin Y and other fluorescence active dye.

| drug                       | Dye or reagent                                    | method      | mechanism                                                         | application                                       | $\lambda_{ex}/\lambda_{em}$ (nm) | Ref.           |
|----------------------------|---------------------------------------------------|-------------|-------------------------------------------------------------------|---------------------------------------------------|----------------------------------|----------------|
| MTX                        | MSA-CdT-QDs as fluorescence probe                 | Fluorimetry | Fluorescence quenching                                            | Pure form and human serum sample                  | 365/500-700                      | <sup>1</sup>   |
| MTX                        | AuNPs probe by nanometal surface energy transfer. | Fluorimetry | quenching nature of the MTX-                                      | Live cells biological samples                     | 633                              | <sup>2</sup>   |
| MTX                        | molybdate                                         | RRS         | RRS based on an ion-association complex between MTX and molybdate | serum and urine                                   | 365/365                          | <sup>3</sup>   |
| ABZ, FBZ & MBZ             | Erythrosine B                                     | Fluorimetry | Fluorescence quenching                                            | Bulk powder, tablets, suspension and human plasma | 517/544                          | <sup>4-6</sup> |
| Mebeverine                 | Eosin y                                           | Fluorimetry | Fluorescence quenching                                            | commercial tablets                                | 390/540                          | <sup>7</sup>   |
| Fluoxetine and paroxetine  | Eosin Y                                           | Fluorimetry | Fluorescence quenching                                            | Bulk powder and pharmaceutical formulations       | 301/545                          | <sup>8</sup>   |
| Amlodipine and nicardipine | Eosin Y                                           | fluorimetry | Fluorescence quenching                                            | Powder and tablets                                | 549                              | <sup>9</sup>   |

**SI Table 2:** polarity index and dielectric constant for solvents used.

| Solvent    | Polarity index | Dielectric constant |
|------------|----------------|---------------------|
| Water      | 9.0            | 80.2                |
| Methanol   | 6.6            | 32                  |
| Acetone    | 5.4            | 20.7                |
| Ethanol    | 5.2            | 24.8                |
| Dioxane    | 4.8            | 2.2                 |
| 2-propanol | 4.2            | 19.9                |



**SI Table 3:** Comparison between the sensitivity of the current fluorescence method and the other techniques in utilized in the determination of MTX.

| <b>Technique</b>   | <b>Range</b>                                                                                                            | <b>Ref</b>     |
|--------------------|-------------------------------------------------------------------------------------------------------------------------|----------------|
| HPLC               | 1-2000 ng mL <sup>-1</sup> (serum)                                                                                      | 10             |
| HPLC               | 5-1000 ng ml <sup>-1</sup> (plasma)<br>25-2000 ng ml <sup>-1</sup> (mouse tissue)                                       | 11             |
| HPLC               | 5–1000 ngml <sup>-1</sup> (plasm)<br>25–2500 ngml <sup>-1</sup> (liver)<br>12.5–2500 ng ml <sup>-1</sup> (other tissue) | 12             |
| CE                 | $7.0 \times 10^{-8} - 1.0 \times 10^{-6}$ M                                                                             | 13             |
| CL                 | $5.0 \times 10^{-9} - 1.0 \times 10^{-7}$ g/ml                                                                          | 14             |
| Polarography       | $5 \times 10^{-7} - 2.5 \times 10^{-5}$ M                                                                               | 15             |
| Voltammetry        | $2.0 \times 10^{-7} - 6.0 \times 10^{-6}$ mol dm <sup>-3</sup>                                                          | 16             |
| ELISA              | 0.25-50 ng ml <sup>-1</sup>                                                                                             | 17             |
| Spectrophotometry  | 4-10 mg L <sup>-1</sup>                                                                                                 | 18             |
| Spectrofluorimetry | 0.0675–0.337 μM                                                                                                         | 1              |
| SERRS              | $2.5 \times 10^{-9} - 1 \times 10^{-6}$ M.                                                                              | 19             |
| Spectrofluorimetry | 70–2500 ng ml <sup>-1</sup><br>0.3–2 μg ml <sup>-1</sup> (biofluids)                                                    | Current method |

1. A. Mohammadinejad, Z. Es' hagh, K. Abnous and S. A. Mohajeri, *Journal of Luminescence*, 2017, 190, 254-260.
2. E.-O. Ganbold, J. Yoon, D. Kim and S.-W. Joo, *Physical Chemistry Chemical Physics*, 2015, 17, 3019-3023.
3. F. Wang, Z. Liu, S. Liu and X. Hu, *Chemical Journal of Chinese Universities*, 2006, 27, 79-81.
4. S. M. Derayea, A. A. Hamad, D. M. Nagy, D. A. Nour-Eldeen, H. R. H. Ali and R. Ali, *Journal of Molecular Liquids*, 2018, 272, 337-343.
5. S. M. Derayea, A. A. Hamad, R. Ali and H. R. H. Ali, *Microchemical Journal*, 2019, 149, 104024.
6. A. A. Hamad, R. Ali, H. R. H. Ali, D. M. Nagy and S. M. Derayea, *RSC advances*, 2018, 8, 5373-5381.
7. S. M. Derayea, *Analytical Methods*, 2014, 6, 2270-2275.
8. S. Derayea, M. Omar, B. Mohammed and R. Ali, *Analytical Chemistry Letters*, 2016, 6, 508-517.
9. S. M. Derayea, H. F. Askal, O. H. Abdel-Megeed and M. A. El Hamd, *Journal of Applied Pharmaceutical Science*, 2012, 2, 84-89.
10. G. Micelli, A. Lozupone, M. Quaranta, A. Donadeo, M. Coviello and V. Lorusso, *Biomedical Chromatography*, 1992, 6, 168-171.
11. J. L. Johnson, A. Ahmad, S. Khan, Y.-F. Wang, A. W. Abu-Qare, J. E. Ayoub, A. Zhang and I. Ahmad, *Journal of Chromatography B*, 2004, 799, 149-155.
12. G. An and M. E. Morris, *Journal of pharmaceutical and biomedical analysis*, 2010, 51, 750-753.
13. S. Han and H. Wang, *Journal of Chromatography B*, 2010, 878, 2901-2904.
14. H. Yao, M. Zhang, W. Zeng, X. Zeng and Z. Zhang, *Spectrochimica Acta Part A: Molecular and Biomolecular Spectroscopy*, 2014, 117, 645-650.
15. S. Golabi and V. Hassan-Zadeh, *Talanta*, 1996, 43, 397-406.
16. Y. Mao, J. Hu, Q. Li and P. Xue, *Analyst*, 2000, 125, 2299-2302.
17. S. U. Flavell and D. J. Flavell, *Journal of immunological methods*, 1988, 115, 179-185.
18. Z. Zhou, C. Wu, L. Zhang, L. Li and X. He, *Chinese Journal of Pharmaceutical Analysis*, 1997, 17, 403-405.
19. C. McLaughlin, D. MacMillan, C. McCardle and W. E. Smith, *Analytical chemistry*, 2002, 74, 3160-3167.
